# Supplementary material
Source: Springer Nature journal article supplement (https://www.springermedizin.de/resource/supplementary/12937_2004_56_MOESM1_ESM.pdf/25654376)
Supplement: MOESM1 [file 25654376]

|              |             | SOC SCORE |                  |       |                  | P-VALUE       |                    |        |
|--------------|-------------|-----------|------------------|-------|------------------|---------------|--------------------|--------|
|              |             | WOMEN     |                  | MEN   |                  | T-TEST        | ANOVA AMONG GROUPS |        |
|              |             | N         | MEAN (95% CI)    | N     | MEAN (95% CI)    | BETWEEN SEXES | WOMEN              | MEN    |
| Gender       |             | 2 545     | 68.5 (68.1-68.9) | 2 446 | 68.4 (68.0-68.8) | ns            | -                  | -      |
| Age          | 25-34 yrs   | 217       | 67.6 (66.0-69.1) | 189   | 65.5 (64.1-67.0) | ns            | 0.039              | 0.0001 |
|              | 35-44 yrs   | 512       | 67.6 (66.7-68.5) | 450   | 66.4 (65.5-67.4) | ns            |                    |        |
|              | 45-54 yrs   | 641       | 68.6 (67.7-69.4) | 653   | 68.3 (67.6-69.1) | ns            |                    |        |
|              | 55-64 yrs   | 659       | 68.7 (67.9-69.5) | 619   | 69.7 (68.9-70.4) | ns            |                    |        |
|              | 65-74 yrs   | 516       | 69.5 (68.6-70.4) | 535   | 69.6 (68.7-70.4) | ns            |                    |        |
| BMI          | <25         | 1 131     | 68.4 (67.8-69.0) | 775   | 68.2 (67.5-68.9) | ns            | ns                 | ns     |
|              | ≥25-<27     | 440       | 69.2 (68.4-70.1) | 609   | 68.6 (67.9-69.4) | ns            |                    |        |
|              | ≥27-<30     | 489       | 68.6 (67.6-69.5) | 665   | 68.6 (67.8-69.3) | ns            |                    |        |
|              | ≥30         | 478       | 68.2 (67.2-69.1) | 397   | 67.9 (66.9-68.9) | ns            |                    |        |
| Education    | ≤9 yrs      | 870       | 68.9 (68.2-69.6) | 967   | 68.8 (68.2-69.4) | ns            |                    |        |
|              | ≥10-≤12 yrs | 1 007     | 68.1 (67.4-68.7) | 997   | 68.0 (67.4-68.6) | ns            |                    |        |
|              | ≥13 yrs     | 668       | 68.6 (67.8-69.4) | 482   | 68.2 (67.3-69.2) | ns            |                    |        |
| SOC quartile | Q1 (low)    | 618       | 54.2 (53.7-54.7) | 588   | 55.0 (54.6-55.5) | 0.035         | ns                 | ns     |
|              | Q2          | 663       | 65.7 (65.5-65.9) | 689   | 65.8 (65.6-65.9) | ns            |                    |        |
|              | Q3          | 640       | 72.9 (72.8-73.1) | 634   | 73.0 (72.8-73.1) | ns            |                    |        |
|              | Q4 (high)   | 624       | 81.2 (80.9-81.4) | 535   | 80.9 (80.6-81.2) | ns            |                    |        |
